# Supplementary material for: Application of Chromatographic and Spectroscopic Methods towards the Quality Assessment of Ginger (Zingiber officinale) Rhizomes from Ecological Plantations
Source: PubMed Central journal article supplement (PMC5343986; doi:10.3390/ijms18020452), 2017-02-20
Supplement: ijms-18-00452-s001.pdf [file ijms-18-00452-s001.pdf]

# Supplementary Materials: Application of Chromatographic and Spectroscopic Methods towards the Quality Assessment of Ginger (*Zingiber officinale*) Rhizomes from Ecological Plantations

Wojciech Koch, Wirginia Kukula-Koch, Zbigniew Marzec, Elwira Kasperek, Lucyna Wyszogrodzka-Koma, Wojciech Szwerz and Yoshinori Asakawa

Table S1. Concentration of standard solution [mg/L] and calibration curve parameters for FAAS analysis.

| Flask Number | 1   | 2   | 3   | 4   | 5   | 6    | 7    | Correlation Coeff. (R) | Precision (% RSD) |
|--------------|-----|-----|-----|-----|-----|------|------|------------------------|-------------------|
| Ca           | 0.5 | 1.0 | 2.0 | 4.0 | 6.0 | 8.0  | 10.0 | 0.9997                 | 1.5-2.0           |
| Mg           | 0.1 | 0.2 | 0.4 | 0.6 | 0.8 | 1.0  | 2.0  | 0.9998                 | 1.2-1.8           |
| K            | 0.2 | 0.4 | 0.6 | 0.8 | 1.0 | 2.0  | 4.0  | 0.9992                 | 2.1-4.5           |
| Na           | 0.2 | 0.4 | 0.6 | 0.8 | 1.0 | 2.0  | 4.0  | 0.9992                 | 1.2-2.3           |
| Zn           | 0.2 | 0.4 | 0.6 | 1.0 | 1.5 | 2.0  | -    | 0.9999                 | 1.4-3.2           |
| Cu           | 0.5 | 1.0 | 2.0 | 6.0 | 8.0 | 10.0 | -    | 0.9994                 | 1.7-2.2           |
| Fe           | 0.5 | 1.0 | 2.0 | 6.0 | 8.0 | 10.0 | -    | 0.9995                 | 1.5-2.8           |
| Mn           | 0.5 | 1.0 | 2.0 | 6.0 | 8.0 | 10.0 | -    | 0.9997                 | 1.2-3.1           |

Table S2. Operating parameters for FAAS analysis.

| Parameter                             | Ca    | Mg    | K     | Na    | Zn    | Cu    | Fe    | Mn    |
|---------------------------------------|-------|-------|-------|-------|-------|-------|-------|-------|
| Wavelength [nm]                       | 422.2 | 285.2 | 766.5 | 589.0 | 213.9 | 324.8 | 248.5 | 279.5 |
| Slit widths [nm]                      | 0.5   | 0.5   | 0.5   | 0.2   | 0.5   | 0.5   | 0.2   | 0.2   |
| Hollow cathode lamp power supply [mA] | 5     | 5     | 10    | 10    | 5     | 4     | 10    | 10    |
| Air flow [L·min <sup>-1</sup> ]       | 5     | 5     | 5     | 5     | 5     | 5     | 5     | 5     |
| Acetylene flow [L·min <sup>-1</sup> ] | 1.1   | 1.1   | 1.1   | 1.1   | 1.1   | 1.1   | 1.1   | 1.0   |
| Torch height [mm]                     | 11.0  | 7.0   | 7.0   | 7.0   | 7.0   | 7.0   | 7.0   | 7.0   |

Table S3. The validation parameters for ETAAS analysis.

| Element | Line (nm) | Drying Temp. (°C) | Pyrolysis Temp. (°C) | Atomization Temp. (°C) | Conc. Range (µg/L) | Correlation Coeff. (R) | Precision (%RSD) |
|---------|-----------|-------------------|----------------------|------------------------|--------------------|------------------------|------------------|
| Pb      | 217.00    | 110               | 900                  | 1900                   | 0-30               | 0.9999                 | 0.6-1.4          |
| Ni      | 232.00    | 110               | 1050                 | 2300                   | 0-70               | 0.9999                 | 0.8-2.2          |
| Cr      | 357.87    | 110               | 1300                 | 2300                   | 0-10               | 0.9998                 | 0.5-6.4          |
| Cd      | 228.80    | 110               | 700                  | 1600                   | 0-2                | 0.9995                 | 0.6-1.5          |

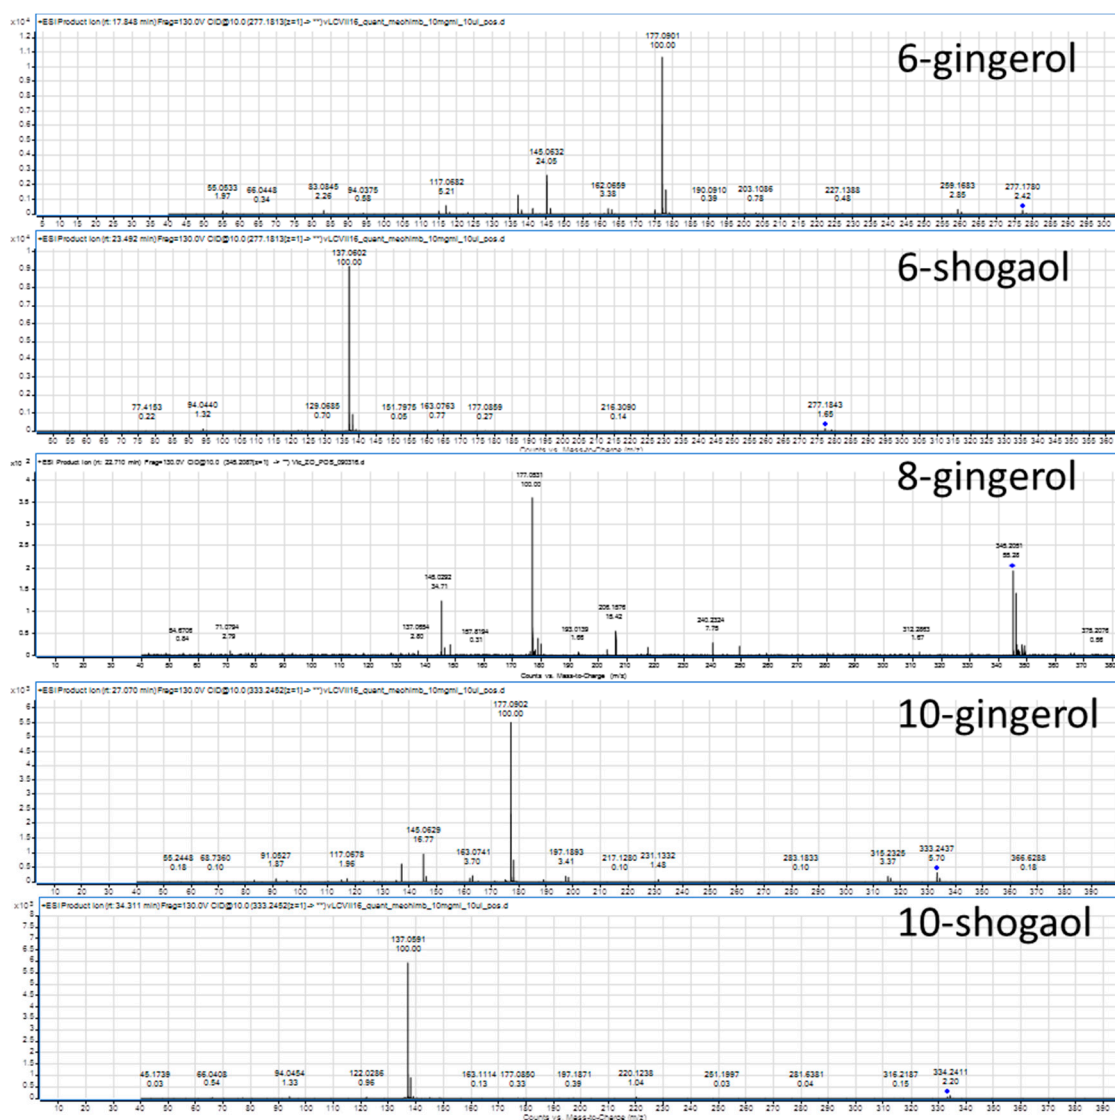

**Figure S1.** MS/MS spectra of gingerols and shogaols determined in the study recorded in the fragmentor energy of 130 V and CID energy of 10 V.
